# Supplementary material
Source: PubMed Central journal article supplement (PMC7854851)
Supplement: NIHMS1622365-supplement-1.pdf [file NIHMS1622365-supplement-1.pdf]

## Epigenetic Mechanisms in Drug Relapse

### SUPPLEMENTAL INFORMATION

#### Table of contents

Table S1. Glossary of epigenetic and physiological terms.

Table S2. Summary of epigenetic changes beyond 24 h after non-contingent repeated drug administration.

Table S3. Summary of epigenetic changes beyond 24 h after drug self-administration.

Table S4. Epigenetic mechanisms of drug relapse assessed by conditioned place preference procedure.

Table S5. Epigenetic mechanisms of operant drug relapse.

**Supplemental Table S1.** Glossary of epigenetic and physiological terms

| <b>Term</b>                                            | <b>Description</b>                                                                                                        |
|--------------------------------------------------------|---------------------------------------------------------------------------------------------------------------------------|
| BDNF (Brain derived neurotrophic factor)               | Neurotrophin that regulates cell growth, survival, and differentiation                                                    |
| BRD4 (Bromodomain-containing protein 4)                | Transcriptional regulator that binds to acetylated lysines on the histones and recruits transcription factors             |
| BRG1 (BRM/SWI2-related gene 1)                         | Chromatin remodeling ATPase                                                                                               |
| CDK5 (Cyclin-dependent kinase 5)                       | Member of the cyclin-dependent kinase family involved in neural development and synaptic plasticity                       |
| Chromatin remodeling                                   | Process that modifies chromatin structure to allow transcription to occur.                                                |
| CK2 $\alpha$ (Casein kinase II alpha)                  | Protein kinase that phosphorylates BRD4 and enables the recruitment of transcription factors to BRD4                      |
| cFos                                                   | Immediate early gene and transcription factor widely used as a cellular marker of neuronal activity                       |
| DNA methylation                                        | Process that adds methyl group to DNA                                                                                     |
| DNMT3A2 (DNA methyltransferase 3A2)                    | Class of de novo DNA methyltransferases that adds methyl groups to CpG sites on DNA                                       |
| Epigenetic mechanisms                                  | Regulation of gene expression mediated through non-DNA encoded mechanisms                                                 |
| G9a (Euchromatic histone-lysine N-methyltransferase 2) | Histone methyltransferase, responsible for methylation of lysines 9 and 27 on histone H3                                  |
| HAT (Histone acetyltransferase)                        | Enzyme that adds acetyl group to the N-terminal tail of histones                                                          |
| HDAC (Histone deacetylase)                             | Enzyme that removes the acetyl group from the N-terminal tail of histones                                                 |
| H3Q5dop (Histone 3 glutamine 5 dopaminylation)         | Addition of dopamine to glutamine 5 of the histone H3 N-terminal tail (1)                                                 |
| Histone lysine demethylase                             | Enzyme that removes the methyl group from lysines of the N-terminal tail of histones                                      |
| HMT (Histone methyltransferase)                        | Enzyme that adds the methyl group to the N-terminal tail of histones                                                      |
| Histone modifications                                  | Post-translational modifications to histones that increase or decrease gene expression                                    |
| INO80 (Inositol auxotroph 80)                          | Chromatin remodeler that regulates transcription through functions such as histone exchange and nucleosome sliding(2, 3)  |
| KDM5C (Lysine demethylase 5C)                          | Histone lysine demethylase that removes the methyl group from lysine 4 on histone 3 (H3K4)                                |
| KDM6B (Lysine demethylase 6B)                          | Histone lysine demethylase that removes the methyl group from lysine 27 on histone 3 (H3K27)                              |
| MLL1 (Mixed-lineage leukemia 1)                        | Histone lysine methyltransferase that adds the methyl group to H3K4                                                       |
| NPAS4 (Neuronal PAS domain protein 4)                  | Immediate early gene and transcription factor regulated by HDAC5                                                          |
| PARP-1 (Poly[ADP-ribose] polymerase 1)                 | Enzyme that plays a role in transcription regulation through activation of transcription factors and regulatory complexes |
| PRDM2 (PR/SET domain 2)                                | Histone methyltransferase that methylates lysine 9 on histone H3                                                          |
| Smad3 (SMAD family member 3)                           | Transcription factor in the TGF- $\beta$ signaling pathway                                                                |
| TGF- $\beta$ (Transforming growth factor beta) family  | Regulatory proteins that play a role in many cellular processes including plasticity                                      |
| UPS (Ubiquitin-proteasome system)                      | Network of proteins involved in protein degradation                                                                       |

**Supplemental Table S2.** Summary of epigenetic changes beyond 24 h after non-contingent repeated drug administration.

**Abbreviations:** AD: abstinence day; ChIP: chromatin immunoprecipitation; dmPFC: dorsomedial prefrontal cortex; H3: histone H3; H3K27ac: acetylation at the 27<sup>th</sup> lysine residue of H3; H3K27me3: trimethylation at the 27<sup>th</sup> lysine residue of H3; H3K36me3: trimethylation at the 36<sup>th</sup> lysine residue of H3; H3K4me3: trimethylation at the 4<sup>th</sup> lysine residue of H3; H3K9me2: dimethylation at the 9<sup>th</sup> lysine residue of H3; H3K9me3: trimethylation at the 9<sup>th</sup> lysine residue of H3; Histone H4; H4R3me2a: asymmetrical dimethylation at the 3<sup>rd</sup> arginine residue of H4; HAT: histone acetylase; HDAC: histone deacetylase; HPC: hippocampus; i.p.: intraperitoneal injection; IHC: immunohistochemistry; IL: infralimbic cortex; KDM: histone lysine demethylase; LC: locus coeruleus; Meth: methamphetamine; mPFC: medial prefrontal cortex; NAc: nucleus accumbens; OFC: orbitofrontal cortex; PFC: prefrontal cortex; PL: prelimbic cortex; qPCR: quantitative polymerase chain reaction; VTA: ventral tegmental area; WB: western blotting. Symbols: ▲: increase; ▼: decrease; —: no change.

| Drug type | Brain regions | Species | Drug administration procedure       | Abstinence day              | General category of epigenetic marks/enzymes                      | Specific epigenetic modifications/enzymes (detecting methods)                                                | Major findings                                                                            | Citations |
|-----------|---------------|---------|-------------------------------------|-----------------------------|-------------------------------------------------------------------|--------------------------------------------------------------------------------------------------------------|-------------------------------------------------------------------------------------------|-----------|
| Cocaine   | NAc           | Mouse   | Repeated (14 days × 20 mg/kg, i.p.) | AD14                        | Histone acetylation                                               | H3 acetylation on <i>Bdnf</i> I and III promoters (ChIP)                                                     | —                                                                                         | (4)       |
| Cocaine   | NAc           | Mouse   | Repeated (28 days × 20 mg/kg, i.p.) | AD28                        | DNA methyltransferase                                             | <i>Dnmt1</i> ; <i>Dnmt3a</i> ; <i>Dnmt3b</i> (qPCR)                                                          | <i>Dnmt1</i> : —<br><i>Dnmt3a</i> : ▲<br><i>Dnmt3b</i> : —                                | (5)       |
| Cocaine   | NAc           | Mouse   | Repeated (7 days × 20 mg/kg, i.p.)  | AD7                         | Histone methylation                                               | H3K9me3 (WB)                                                                                                 | ▼                                                                                         | (6)       |
| Cocaine   | NAc           | Mouse   | Repeated (7 days × 20 mg/kg, i.p.)  | AD5<br>AD10                 | Histone deacetylase                                               | <i>Sirt1</i> ; <i>Sirt2</i> (qPCR)                                                                           | <i>Sirt1</i> : ▲; <i>Sirt2</i> : —<br><i>Sirt1</i> : —; <i>Sirt2</i> : —                  | (7)       |
| Cocaine   | NAc           | Mouse   | Repeated (10 days × 20 mg/kg, i.p.) | AD7                         | Subunits of chromatin-remodeling complex                          | BRD2;<br>BRD3;<br>BRD4 (WB)                                                                                  | —                                                                                         | (8)       |
|           |               | Rat     | Repeated (10 days × 10 mg/kg, i.p.) | —                           |                                                                   |                                                                                                              |                                                                                           |           |
| Cocaine   | NAc           | Mouse   | Repeated (7 days × 20 mg/kg, i.p.)  | AD7<br>AD14<br>AD28<br>AD42 | Histone methylation                                               | H4R3me2a; H3K9me2<br>H3K36me3 (WB)                                                                           | H4R3me2a: ▲<br>—<br>—<br>—<br>H3K9me2: — (all timepoints)<br>H3K36me3: — (all timepoints) | (9)       |
| Cocaine   | NAc           | Mouse   | Repeated (7 days × 20 mg/kg, i.p.)  | AD7                         | Subunits of chromatin-remodeling complex                          | <i>Baz1a</i> (qPCR)                                                                                          | —                                                                                         | (10)      |
| Cocaine   | NAc           | Mouse   | Repeated (7 days × 15 mg/kg, i.p.)  | AD28                        | DNA methyltransferase                                             | <i>Dnmt1</i> ; <i>Dnmt3a</i> ; <i>Dnmt3b</i> (qPCR); DNMT activity (DNMT activity assay kit)                 | <i>Dnmt1</i> : —<br><i>Dnmt3a</i> : ▲<br><i>Dnmt3b</i> : ▲<br>DNMT activity: ▲            | (11)      |
| Cocaine   | NAc           | Mouse   | Repeated (10 days × 20 mg/kg, i.p.) | AD28                        | Transcription factor; histone acetylation and histone methylation | <i>Nr4a1</i> (qPCR);<br><i>Nr4a1</i> binding at <i>Nr4a1</i> promoter;<br>H3K27me3 on <i>Nr4a1</i> promoter; | —<br>▲<br>—                                                                               | (12)      |

|             |           |       |                                                            |                            |                                                                                             |                                                                                                                                                                                                                                                          |                                                                                                                                                                                                                                                                                                                               |      |
|-------------|-----------|-------|------------------------------------------------------------|----------------------------|---------------------------------------------------------------------------------------------|----------------------------------------------------------------------------------------------------------------------------------------------------------------------------------------------------------------------------------------------------------|-------------------------------------------------------------------------------------------------------------------------------------------------------------------------------------------------------------------------------------------------------------------------------------------------------------------------------|------|
|             |           |       |                                                            |                            |                                                                                             | H3K27ac on <i>Nr4a1</i> promoter;<br>H3K4me3 on <i>Nr4a1</i> promoter;<br><i>Nr4a1</i> binding at <i>Cartpt</i><br>promoter;<br>H3K27me3 on <i>Cartpt</i> promoter;<br>H3K27ac on <i>Cartpt</i> promoter;<br>H3K4me3 on <i>Cartpt</i> promoter<br>(ChIP) | ▲<br>▲<br>▲<br>▼<br>▲<br>▲                                                                                                                                                                                                                                                                                                    |      |
| Cocaine     | mPFC      | Mouse | Repeated ((4 days × 20 mg/kg, i.p.)                        | AD3<br>AD7<br>AD14<br>AD30 | Histone lysine demethylase                                                                  | KDM6B (WB)                                                                                                                                                                                                                                               | ▲<br>▲<br>▲<br>—                                                                                                                                                                                                                                                                                                              | (13) |
| Cocaine     | PL and IL | Mouse | Repeated ((4 days × 20 mg/kg, i.p.)                        | AD7                        | Histone lysine demethylase                                                                  | KDM6B (IHC)                                                                                                                                                                                                                                              | PL: ▲<br>IL: —                                                                                                                                                                                                                                                                                                                |      |
| Cocaine     | VTA       | Mouse | Repeated (14 days × 20 mg/kg, i.p.)                        | AD14                       | Histone acetylation                                                                         | H3 acetylation on <i>Bdnf</i> I and III promoters (ChIP)                                                                                                                                                                                                 | —                                                                                                                                                                                                                                                                                                                             | (4)  |
| Amphetamine | Striatum  | Mouse | Repeated (7 days × 4 mg/kg, i.p.)                          | AD5                        | Histone acetylation and methylation                                                         | HDAC1 and H3K9me2 binding at <i>cFos</i> promoter(ChIP)                                                                                                                                                                                                  | ▲                                                                                                                                                                                                                                                                                                                             | (14) |
| Amphetamine | NAC       | Rat   | Repeated (14 days × 1 mg/kg, i.p.)                         | AD14                       | DNA methylation                                                                             | Global DNA methylation(radio-labelled [ <sup>3</sup> H]-dCTP extension assay)                                                                                                                                                                            | ▲                                                                                                                                                                                                                                                                                                                             | (15) |
|             | mPFC      |       |                                                            |                            |                                                                                             |                                                                                                                                                                                                                                                          | ▲                                                                                                                                                                                                                                                                                                                             |      |
|             | OFC       |       |                                                            |                            |                                                                                             |                                                                                                                                                                                                                                                          | ▲                                                                                                                                                                                                                                                                                                                             |      |
| Meth        | HPC       | Mouse | Repeated (4 days × 2 mg/kg, i.p.)                          | AD2                        | DNA methyltransferase and transcription factor                                              | DNMT1;DNMT3A; DNMT3B; MECP2 (WB)                                                                                                                                                                                                                         | DNMT1: ▼<br>DNMT3A: ▼<br>DNMT3B: ▼<br>MECP2: ▼                                                                                                                                                                                                                                                                                | (16) |
|             | PFC       |       |                                                            |                            |                                                                                             |                                                                                                                                                                                                                                                          | DNMT1: ▲<br>DNMT3a: —<br>DNMT3b: ▲<br>MECP2: ▲                                                                                                                                                                                                                                                                                |      |
| Morphine    | VTA       | Rat   | Repeated (every other day: 10, 20, 30, 40, 50 mg/kg, i.p.) | AD7                        | Histone methylation and acetylation                                                         | H3K9me3 and H3K9/K14ac on <i>Bdnf</i> promoter II and III (ChIP)                                                                                                                                                                                         | H3K9me3: ▼ (II and III)<br>H3K9/K14ac: — (II and III)                                                                                                                                                                                                                                                                         | (17) |
|             | LC        |       |                                                            |                            |                                                                                             |                                                                                                                                                                                                                                                          | H3K9me3: ▼ (II and III)<br>H3K9/K14ac: ▲(II); — (III)                                                                                                                                                                                                                                                                         |      |
| Morphine    | VTA       | Rat   | Repeated (14 days × 5 mg/kg)                               | AD14                       | RNA polymerase II (Pol II); various histone modifications and enzymes; transcription factor | Binding at <i>Bdnf</i> promoters (ChIP):<br>Pol II; H3 acetylation; H4 acetylation; H3K4me3; H3K9me2; H3K9me3; H3K27me3; H3K36me3; HDAC complex; Mll1; G9a; PRC2, PRC1; CREB; NURR1                                                                      | Pol II: ▼ (II, IV, VI)<br>H3 acetylation: ▼ (II)<br>H4 acetylation: — (II)<br>H3K4me3: ▲ (II)<br>H3K9me2: — (II)<br>H3K9me3: — (II)<br>H3K27me3: ▲ (II)<br>H3K36me3: — (II)<br>HDAC complex: ▲ (II)<br>Mll1: ▲ (II); G9a: — (II)<br>PRC1: ▲ (II); PRC2: ▼ (II)<br>CREB: ▲ (VI)<br>pCREB: ▼ (I, II and IV)<br>NURR1: ▼ (I, II) | (18) |
| Morphine    | NAC       | Mouse | Repeated (7 days × 20 mg/kg, i.p.)                         | AD5<br>AD10                | Histone deacetylase                                                                         | <i>Sirt1</i> ; <i>Sirt2</i> (qPCR)                                                                                                                                                                                                                       | <i>Sirt1</i> : ▲; <i>Sirt2</i> : —<br><i>Sirt1</i> : —; <i>Sirt2</i> : —                                                                                                                                                                                                                                                      | (7)  |

|           |       |       |                                                                                       |                                                                    |                                                                                                       |                                                                                                           |                                                                                                                              |      |
|-----------|-------|-------|---------------------------------------------------------------------------------------|--------------------------------------------------------------------|-------------------------------------------------------------------------------------------------------|-----------------------------------------------------------------------------------------------------------|------------------------------------------------------------------------------------------------------------------------------|------|
| Oxycodone | HPC   | Rat   | Repeated (4 days × 3 mg/kg, i.p.)                                                     | AD10 (post extinction)<br>AD11 (post stress-induced reinstatement) | DNA methylation<br><br>DNA methyltransferase and ten-eleven translocations methylcytosine dioxygenase | Global 5-mc (5-mc DNA ELISA kit)<br><br><i>Dnmt1;Dnmt3a;Dnmt3b</i> (qPCR)<br><i>Tet1;Tet2;Tet3</i> (qPCR) | 5-mc: ▼<br><br><i>Dnmt1</i> : ▼; <i>Dnmt3a</i> : —<br><i>Dnmt3b</i> : —<br><i>Tet1</i> : ▲; <i>Tet2</i> : —; <i>Tet3</i> : — | (19) |
| Ethanol   | PFC   | Rat   | Repeated (two consecutive days with two days gap for 2 weeks × 3 g/kg, 25% v/v, i.p.) | AD14                                                               | Histone acetyl transferase and histone deacetylase                                                    | HAT and HDAC activity (ELISA)                                                                             | —                                                                                                                            | (20) |
| Ethanol   | PFC   | Mouse | Alcohol vapor (72 h continuous exposure)                                              | AD21                                                               | Various histone modification enzymes and complexes                                                    | Microarrays                                                                                               | —                                                                                                                            | (21) |
|           |       |       | Alcohol vapor (16 h/day × 3 days)                                                     | AD3                                                                | Histone acetylation                                                                                   | H3K9ac (WB)<br>H3K14ac<br>H3K27ac                                                                         | —<br>—<br>—                                                                                                                  |      |
|           | mPFC  | Rat   | Alcohol vapor 14 h/day × 7 weeks)                                                     | AD21                                                               | DNA methylation<br>DNMT1<br>5MeC                                                                      | Global methylation kit<br>IHC<br>IHC                                                                      | ▲<br>▲ in neurons<br>▲ in neurons                                                                                            |      |
| Ethanol   | dmPFC | Rat   | Alcohol vapor (14 h/day × 7 weeks)                                                    | AD21                                                               | Histone demethylase                                                                                   | <i>Kdm6b</i> (qPCR)                                                                                       | <i>Kdm6b</i> : ▼                                                                                                             | (22) |
|           | NAc   |       |                                                                                       |                                                                    | Histone methyltransferase<br>Histone methylation                                                      | <i>Prdm2</i> (qPCR)<br>H3K9me1 (WB)                                                                       | <i>Prdm2</i> : ▼<br>▼                                                                                                        |      |
|           |       |       |                                                                                       |                                                                    | DNA methylation                                                                                       | Global methylation kit                                                                                    | ▲                                                                                                                            |      |
|           |       |       |                                                                                       |                                                                    | Histone demethylase and histone methylation                                                           | KDM6B (qPCR and WB)<br>H3K27me3 (WB)<br>H3K27me3 binding (ChIP-seq)                                       | <i>Kdm6b</i> mRNA: ▼<br>KDM6B protein: ▲<br>H3K27me3: ▼<br>H3K27me3 (ChIP-seq): ▼                                            |      |
| Ethanol   | NAc   | Mouse | Alcohol vapor (16 h/day × 3 days)                                                     | AD3                                                                | Histone acetylation                                                                                   | H3K9ac (WB)<br>H3K14ac<br>H3K27ac                                                                         | —<br>—<br>—                                                                                                                  | (23) |
| Ethanol   | HPC   | Rat   | Repeated (3 g/kg, 15% v/v, i.p., twice 9 h apart)                                     | AD2                                                                | Histone deacetylase                                                                                   | HDAC2(HDAC activity assay, qPCR, WB and Flow cytometry)                                                   | HDAC activity: ▲<br><i>Hdac2</i> mRNA: ▲<br>HDAC2 protein: ▲<br>HDAC2+ Neurons %: ▲                                          | (24) |
| Ethanol   | HPC   | Rat   | Drinking water (6% v/v × 16 weeks)                                                    | AD3                                                                | Histone acetylation                                                                                   | H3K9ac at <i>Grin2b</i> promoter (ChIP)                                                                   | H3K9ac: ▼                                                                                                                    | (25) |
| Nicotine  | NAc   | Rat   | Repeated (14 days × 0.3 mg/kg, i.p.)                                                  | AD14                                                               | DNA methylation                                                                                       | Global DNA methylation(radio-labelled [ <sup>3</sup> H]-dCTP extension assay)                             | ▲                                                                                                                            | (15) |
|           | mPFC  |       |                                                                                       |                                                                    |                                                                                                       |                                                                                                           | ▲                                                                                                                            |      |
|           | OFC   |       |                                                                                       |                                                                    |                                                                                                       |                                                                                                           | ▲                                                                                                                            |      |

**Supplemental Table S3.** Summary of epigenetic changes beyond 24 h after drug self-administration.

**Abbreviations:** AD: abstinence day; CC: corpus callosum; CeA: central amygdala; ChIP-seq: chromatin immunoprecipitation followed by massively parallel DNA sequencing; ChIP: chromatin immunoprecipitation; Co-IP: co-immunoprecipitation; DEG; differentially expressed genes; DNMT: DNA methyltransferase; DS: dorsal striatum; GO: gene ontology; H3: histone H3; H3K4me3: trimethylation at the 4<sup>th</sup> lysine residue of H3; H3K4me3Q5dop: H3 lysine 4 trimethylation in combination with H3 glutamine 5 dopaminylation on the same histone tail; H3K9K14Ac2: H3 di-acetyl lysine 9, lysine 14; H3Q5dop: H3 glutamine 5 dopaminylation; HAT: histone acetyltransferase; HDAC: histone deacetylase; HPC: hippocampus; Inf: infusions; Me-DIP: methylated DNA immunoprecipitation; Meth: methamphetamine; mPFC: medial prefrontal cortex; NAc: nucleus accumbens; OFC: orbitofrontal cortex; PFC: prefrontal cortex; qPCR: quantitative polymerase chain reaction; TSS: transcriptional start site; VTA: ventral tegmental area; WB: Western blot. Symbols: ▲: increase; ▼: decrease; —: no change.

| Drug type | Brain region | Species | Operant training                                                                  | Abstinence day | General category of epigenetic mark/enzyme       | Specific epigenetic mark/enzyme                                                   | Major findings                                   | Citations |
|-----------|--------------|---------|-----------------------------------------------------------------------------------|----------------|--------------------------------------------------|-----------------------------------------------------------------------------------|--------------------------------------------------|-----------|
| Cocaine   | NAc          | Rat     | 6 h/d × 10 d (0.5 mg/kg/inf)                                                      | AD45           | DNMT                                             | <i>Dnmt3a1</i><br><i>Dnmt3a2</i> (qPCR)                                           | —<br>—                                           | (26)      |
| Cocaine   | NAc          | Rat     | 2 h/d × 10 d (0.7 mg/kg/inf)                                                      | AD28           | Genome-wide analysis<br>Transcription factors    | DEGs<br><i>Nr4a1</i><br><i>Ef21</i><br><i>Ndn</i> (RNA-seq)                       | 344<br>—<br>▼<br>▲                               | (12)      |
|           |              |         |                                                                                   |                |                                                  | Transcription factors                                                             | <i>Nr4a1</i><br><i>Ef21</i><br><i>Ndn</i> (qPCR) |           |
|           |              |         |                                                                                   |                | Genome-wide analysis                             | DEGs (RNA-seq)<br>DEGs (RNA-seq)                                                  | 45<br>1,929                                      |           |
|           | PFC<br>VTA   |         |                                                                                   |                |                                                  |                                                                                   |                                                  |           |
| Cocaine   | NAc          | Rat     | 6 h/d × ≥ 5 d, 4 trials/h × 24 h/d × 10 d discrete-trial schedule (1.5 mg/kg/inf) | AD10/AD100     | Immediate early genes                            | <i>Egr1</i><br><i>Nr4a1</i><br><i>Fos</i> (qPCR)                                  | ▼/▼<br>—/▼<br>▼/▼                                | (27)      |
|           | mPFC         |         |                                                                                   |                | <i>Egr1</i><br><i>Nr4a1</i><br><i>Fos</i> (qPCR) | —/—<br>▼/▼<br>▼/▼                                                                 |                                                  |           |
|           | mPFC         |         |                                                                                   | AD10           | Histone acetylation                              | Acetylated histone H3 (K9-14) at promoters of<br><i>Egr1</i><br><i>NPY</i> (ChIP) | ▼<br>▼                                           |           |
| Cocaine   | mPFC         | Rat     | 6 h/d × ≥ 5 d, 4 trials/h × 24 h/d × 10 d discrete-trial schedule (1.5 mg/kg/inf) | AD10           | Genome-wide analysis                             | Changed genes (microarray analysis)                                               | 668 (direction not specified)                    | (28)      |
|           | NAc          |         |                                                                                   | AD100          | Genome-wide analysis                             | Changed genes (microarray analysis)                                               | 346 (direction not specified)                    |           |
|           | mPFC         |         |                                                                                   | AD10/AD100     | Transcription factor                             | <i>Erg1</i><br><i>Fos</i><br><i>Nr4a1</i> (qPCR)                                  | —/—<br>▼/▼<br>▼/▼                                |           |
|           | NAc          |         |                                                                                   | AD10/AD100     | Transcription factor                             | <i>Egr2</i><br><i>Fos</i><br><i>Nr4a1</i> (qPCR)                                  | —/▼<br>▼/▼<br>—/▼                                |           |
| Cocaine   | NAc          | Rat     | 2 h/d × 10 d (1 mg/kg/inf)                                                        | AD7            | Transcription factor                             | p-SMAD3<br>SMAD3 (WB)                                                             | ▲<br>—                                           | (29)      |

|         |     |       |                                     |      |                                                    |                                                                                                                                                    |                                 |      |
|---------|-----|-------|-------------------------------------|------|----------------------------------------------------|----------------------------------------------------------------------------------------------------------------------------------------------------|---------------------------------|------|
|         |     |       |                                     |      |                                                    | SMAD3 binding at promoters of<br><i>Ctnnb1</i><br><i>Grin2a</i><br><i>Mef2d</i><br><i>Cap2</i><br><i>Dbn1</i><br><i>Pdyn</i><br><i>Cfl1</i> (ChIP) | ▲<br>▲<br>▲<br>▲<br>▲<br>—<br>— |      |
| Cocaine | NAC | Mouse | 3 h/d × 3 weeks<br>(0.75 mg/kg/inf) | AD28 | DNA methylation                                    | <i>Dmnt1</i><br><i>Dmnt3a</i><br><i>Dmnt3b</i> (qPCR)                                                                                              | —<br>▲<br>—                     | (5)  |
| Cocaine | VTA | Rat   | 6 h/d × 10 d (0.5 mg/kg/inf)        | AD30 | H3 dopaminylation                                  | H3Q5dop<br>H3K4me3Q5dop<br>H3K4me3<br>H3                                                                                                           | ▲<br>—<br>—<br>—                | (1)  |
|         |     |       | 1 h/d × 10 d (0.5 mg/kg/inf)        |      | Transglutaminase<br>H3 dopaminylation              | Tgm2 (WB)<br>H3Q5dop<br>H3K4me3Q5dop<br>H3K4me3                                                                                                    | —<br>—<br>—<br>—                |      |
|         |     |       | 6 h/d × 10 d (0.5 mg/kg/inf)        |      | Histone methylation<br>Histone<br>Transglutaminase | H3<br>Tgm2 (WB)                                                                                                                                    | —<br>—                          |      |
| Cocaine | NAC | Rat   | 6 h/d × 10 d (0.75 mg/kg/inf)       | AD30 | DNA methylation                                    | DNA methylation (Me-DIP)                                                                                                                           | ▲                               | (30) |
| Cocaine | CC  | Rat   | 3 h/d × 14 d (0.75 mg/kg/inf)       | AD30 | DNA methylation                                    | Methylation of <i>Sox10</i> (sodium bisulfite conversion and PCR)                                                                                  | ▼                               | (31) |
| Cocaine | NAC | Rat   | 2 h/d × 10 d (1 mg/kg/inf)          | AD7  | Chromatin remodeler<br>Transcription factor        | BRG1<br>p-SMAD3<br>SMAD3 (WB)                                                                                                                      | ▲<br>▲<br>—                     | (32) |
|         |     |       |                                     |      | Chromatin remodeler<br>Transcription factor        | BRG1 interaction with SMAD3 (Co-IP)                                                                                                                | ▲                               |      |
|         |     |       |                                     |      | Chromatin remodeler                                | BRG1 binding at promoters of<br><i>Ctnnb1</i><br><i>Grin2a</i><br><i>Mef2d</i><br><i>Cap2</i><br><i>Dbn1</i><br><i>Pdyn</i> (ChIP)                 | ▲<br>—<br>▲<br>▲<br>▲<br>—      |      |
| Cocaine | NAC | Rat   | 2 h/d × 10 d (1 mg/kg/inf)          | AD7  | Transcription factors                              | p-SMAD1/5<br>SMAD1<br>SMAD5<br>RUNX2 (WB)                                                                                                          | ▲<br>▲<br>▲<br>▲                | (33) |
|         |     |       |                                     |      | Transcription factor                               | RUNX2 binding at promoters of<br><i>Egr3</i><br><i>Dnml1</i><br><i>Tgfbr1</i><br><i>Smarca4</i> (ChIP)                                             | ▲<br>▲<br>—<br>▲                |      |
| Cocaine | NAC | Rat   | 6 h/d × 10 d (0.5 mg/kg/inf)        | AD30 | Chromatin remodeler<br>Transcription factor        | INO80<br>EGR1 (WB)                                                                                                                                 | ▲<br>▼                          | (34) |

|         |          |     |                                                                  |          |                                                                                               |                                                                                                                                                 |                                                                    |      |
|---------|----------|-----|------------------------------------------------------------------|----------|-----------------------------------------------------------------------------------------------|-------------------------------------------------------------------------------------------------------------------------------------------------|--------------------------------------------------------------------|------|
|         |          |     |                                                                  |          | Transcription factor                                                                          | EGR1 binding at promoter of <i>Trim3</i> (ChIP)                                                                                                 | ▼                                                                  |      |
|         |          |     |                                                                  |          | Chromatin remodeler                                                                           | INO80 binding near TSS of <i>Yy1</i><br><i>Jmjd6</i><br><i>Ddx39b</i> (ChIP-seq)                                                                | ▲<br>▲<br>▲                                                        |      |
|         |          |     |                                                                  |          | Transcription factor<br>Histone demethylase                                                   | <i>Yy1</i><br><i>Jmjd6</i><br><i>Ddx39b</i> (qPCR)                                                                                              | ▲<br>▲<br>▲                                                        |      |
| Cocaine | VTA      | Rat | 2 h/d × 14 d (0.25 mg/59 µl/inf)                                 | AD7      | HAT                                                                                           | CBP binding at promoters containing <i>Bdnf</i> exon I<br><i>Bdnf</i> exon IV (ChIP)                                                            | ▲<br>—                                                             | (35) |
|         |          |     |                                                                  |          | Histone acetylation                                                                           | H3K9K14Ac2 binding at promoters containing <i>Bdnf</i> exon I<br><i>Bdnf</i> exon IV (ChIP)                                                     | ▲<br>—                                                             |      |
| Cocaine | HPC      | Rat | 2 h/d × 12 (0.5 mg/kg/inf)                                       | AD3/AD10 | Genome-wide analysis and ten-eleven translocations methylcytosine dioxygenase DNA methylation | Tet3 target genes (microarray analysis)<br>5-hmC<br><br>Differential enrichment peaks                                                           | 9▲/16▲<br>▲/▲<br><br>1511/1842                                     | (36) |
| Meth    | Striatum | Rat | 15 h/d × 8 d (0.1 mg/kg/inf)                                     | AD30     | Genome-wide analysis                                                                          | DEGs (microarray analysis)                                                                                                                      | 82 ▲<br>591 ▼                                                      | (37) |
| Meth    | CeA      | Rat | 3 h/session × 3 sessions/d × 10 sessions in 14 d (0.1 mg/kg/inf) | AD35     | Genome-wide analysis                                                                          | GO analysis (histone methylation)<br>DEGs (RNA-seq)                                                                                             | Histone methylation<br>▲<br>1940 (30) ▲, 277 (22) ▼                | (38) |
|         | OFC      |     |                                                                  |          |                                                                                               | DEGs (RNA-seq)                                                                                                                                  |                                                                    |      |
| Meth    | DS       | Rat | 15 h/d × 8 d (0.1 mg/kg/inf)                                     | AD30     | Immediate early genes                                                                         | <i>cFos</i><br><i>FosB</i><br><i>Δfosb</i> (qPCR)                                                                                               | —<br>—<br>—                                                        | (39) |
|         |          |     |                                                                  |          | Immediate early genes                                                                         | <i>cFos</i><br><i>FosB</i><br><i>ΔFosB</i>                                                                                                      | ▼<br>—<br>▼                                                        |      |
|         |          |     |                                                                  |          | Histone methylation<br>Transcription factor                                                   | H3K4me3<br>p-CREB<br>CREB (WB)                                                                                                                  | —<br>▼<br>▼                                                        |      |
| Meth    | DS       | Rat | 3 h/session × 3 sessions/d × 10 sessions in 14 d (0.1 mg/kg/inf) | AD2/AD35 | HDACs                                                                                         | <i>Hdac1</i><br><i>Hdac2</i><br><i>Hdac3</i><br><i>Hdac4</i><br><i>Hdac5</i><br><i>Sirt1</i><br><i>Sirt2</i><br><i>Crebbp</i><br><i>Suv39h1</i> | —/—<br>—/—<br>—/—<br>—/—<br>—/—<br>—/—<br>—/—<br>—/—<br>—/—<br>—/— | (40) |
|         |          |     |                                                                  |          | HAT<br>Histone methyltransferases                                                             | <i>G9a</i><br><i>GLP</i><br><i>Mll1</i>                                                                                                         | —/—<br>—/—<br>—/▲                                                  |      |



|  |  |  |  |  |                                                     |                                      |            |  |
|--|--|--|--|--|-----------------------------------------------------|--------------------------------------|------------|--|
|  |  |  |  |  | Histone lysine demethylase<br>DNA methyltransferase | <i>Kdm1a</i><br><i>Dnmt3a</i> (qPCR) | -/-<br>-/- |  |
|--|--|--|--|--|-----------------------------------------------------|--------------------------------------|------------|--|

**Supplemental Table S4.** Epigenetic mechanisms of drug relapse assessed by conditioned place preference procedure.

**Abbreviations:** AAV: adeno-associated virus; AD: abstinence day; BLA: basolateral amygdala; CeA: central amygdala; HDAC: histone deacetylase; KDM: histone lysine demethylase; Meth: methamphetamine; MHb: medial habenula; NAC: nucleus accumbens; shRNA: short hairpin RNA.

| Drug type | Brain region | Species | Acquisition                                         | Extinction/Reconditioning                                                                            | Drug-primed reinstatement | Abstinence day | Epigenetic manipulation                                                                                             | Behavioral outcomes                                | Citations |
|-----------|--------------|---------|-----------------------------------------------------|------------------------------------------------------------------------------------------------------|---------------------------|----------------|---------------------------------------------------------------------------------------------------------------------|----------------------------------------------------|-----------|
| Cocaine   | Systemic     | Mouse   | 2 days × 20 mg/kg, i.p.                             | 8 days (non-confined)                                                                                | 10 mg/kg, i.p.            | AD10           | HDAC inhibitor (NaBut), 8 days × 1.2 g/kg, i.p., immediately after extinction                                       | Facilitated extinction and decreased reinstatement | (41)      |
|           |              |         |                                                     | 2 days (confined)                                                                                    | N/A                       | AD5            | HDAC inhibitor (NaBut), 2 days × 1.2 g/kg, i.p., immediately after extinction (exposure to drug-paired compartment) | Facilitated extinction                             |           |
|           |              |         |                                                     | 8 days (confined)                                                                                    | 10 mg/kg, i.p.            | AD12           | HDAC inhibitor (NaBut), 8 days × 1.2 g/kg, i.p., immediately after extinction                                       | Decreased reinstatement                            |           |
|           |              |         |                                                     | 2 days (confined)                                                                                    | 10 mg/kg, i.p.            | AD5            | HDAC inhibitor (NaBut), 2 days × 1.2 g/kg, i.p., 10 h after extinction                                              | No effect on extinction or reinstatement           |           |
|           |              |         |                                                     | N/A                                                                                                  | 10 mg/kg, i.p.            | AD5            | HDAC inhibitor (NaBut), 2 days × 1.2 g/kg, i.p. during abstinence                                                   | No effect on extinction or reinstatement           |           |
| Cocaine   | Systemic     | Mouse   | 4 days × 5 or 15 mg/kg, i.p.                        | 7 days (non-confined)                                                                                | N/A                       | N/A            | HDAC inhibitor (NaBut), 1.2 g/kg, i.p. before 1 <sup>st</sup> conditioning session                                  | Increased resistance to extinction                 | (42)      |
|           |              |         |                                                     | 7 days (non-confined)                                                                                |                           |                | HDAC inhibitor (NaBut), 1.2 g/kg, i.p. immediately after 1 <sup>st</sup> extinction session                         | Increased resistance to extinction                 |           |
|           |              |         | 4 days × escalating dose (3, 6, 12, 24 mg/kg), i.p. | 8 days (4 days × non-confined + 4 days × confined)                                                   | 11.25 mg/kg               | AD12           | HDAC inhibitor (NaBut), 5 days × 1.2 g/kg, i.p. immediately after extinction                                        | Inhibited extinction, no change in reinstatement   |           |
|           |              |         |                                                     | HDAC inhibitor (NaBut), 4 days × 1.2 g/kg, i.p. immediately after 2 <sup>nd</sup> extinction session |                           |                | No change in extinction or reinstatement                                                                            |                                                    |           |
| Cocaine   | Systemic     | Mouse   | 2 days × 20 mg/kg, i.p.                             | 4 days (non-confined)                                                                                | N/A                       | N/A            | HDAC inhibitor (NaBut), 4 days × 0.3, 0.6 or 1.2 g/kg, i.p. immediately after 2 <sup>nd</sup> extinction session    | No change on extinction                            | (43)      |
|           |              |         |                                                     | Post-extinction reconditioning (1 day × 5 mg/kg, i.p.)                                               |                           |                | AD21                                                                                                                | N/A                                                |           |
| Cocaine   | Systemic     | Mouse   | 2 days × 20 mg/kg, i.p.                             | 6 days (non-confined)                                                                                | 10 mg/kg, i.p.            | AD7            | HDAC3 inhibitor (RGFP966), 2 days × 3 or 10 mg/kg, s.c.,                                                            | Facilitated extinction and decreased               | (44)      |

|          |          |       |                         |                       |               |                    |                                                                                                                     |                                                                                               |      |                                                                            |
|----------|----------|-------|-------------------------|-----------------------|---------------|--------------------|---------------------------------------------------------------------------------------------------------------------|-----------------------------------------------------------------------------------------------|------|----------------------------------------------------------------------------|
|          |          |       |                         |                       |               |                    | after 1 <sup>st</sup> and 2 <sup>nd</sup> extinction sessions                                                       | reinstatement (10mg/kg)                                                                       |      |                                                                            |
| Cocaine  | Systemic | Mouse | 4 days × 20 mg/kg, i.p. | N/A                   | N/A<br>N/A    | AD5<br>AD7         | KDM6B inhibitor (GSK-J4), 5 days (AD3 to 7) × 0.5 mg/kg, i.p.)                                                      | No change in CPP<br>Decreased CPP                                                             | (13) |                                                                            |
|          |          |       |                         |                       |               |                    | N/A<br>N/A<br>10 mg/kg, i.p.                                                                                        | AD5<br>AD7<br>AD14                                                                            |      | KDM6B inhibitor (GSK-J4), 3 days (AD5 to 7) × 0.5 mg/kg, i.p.)             |
| Cocaine  | Systemic | Mouse | 3 days × 20 mg/kg, i.p. | 6 days (non-confined) | 5 mg/kg, i.p. | AD9                | BET inhibitor [(+)JQ1, 25 mg/kg, prior to daily extinction sessions)                                                | Decreased reinstatement                                                                       | (45) |                                                                            |
|          | NAc      | Mouse |                         |                       |               |                    | CK2α inhibitor (CX4945, 100 μM, prior to daily extinction                                                           | Decreased extinction and reinstatement                                                        |      |                                                                            |
| Cocaine  | Systemic | Rat   | 5 days × 15 mg/kg, i.p. | N/A                   | N/A           | AD1<br>AD7<br>AD14 | PARP-1 inhibitor (ABT-888), 7.5 or 15 mg/kg, i.p., injected 50 min before 1 <sup>st</sup> CPP tests                 | Decreased CPP<br>Decreased CPP<br>Decreased CPP                                               | (46) |                                                                            |
|          | CeA/BLA  | Rat   | 5 days × 15 mg/kg, i.p. |                       |               |                    | AD1<br>AD7<br>AD14                                                                                                  | PARP-1 inhibitor (PJ-34, 50 μM/0.5 μl, i.c., injected 30 min before 1 <sup>st</sup> CPP tests |      | CeA: Decreased CPP<br>Decreased CPP<br>Decreased CPP<br>No change with BLA |
|          | CeA      | Rat   | 5 days × 15 mg/kg, i.p. |                       |               |                    | AD1<br>AD7<br>AD14                                                                                                  | Lentivirus-PARP-1-shRNA, injected days before training                                        |      | Decreased CPP<br>No change in CPP<br>No change in CPP                      |
|          | CeA      | Rat   | 5 days × 15 mg/kg, i.p. |                       |               |                    | AD1<br>AD7<br>AD14                                                                                                  | Lentivirus-D3ZLJ1(downstream target of PARP-1), injected days before training                 |      | Decreased CPP<br>Decreased CPP<br>Decreased CPP                            |
| Cocaine  | MHb      | Mouse | 4 days × 10 mg/kg, i.p. | 6 days (non-confined) | 5 mg/kg, i.p. | AD8                | AAV-DIO-HDAC3 (expressed in cholinergic neurons), injected days before training                                     | No change in reinstatement                                                                    | (47) |                                                                            |
| Meth     | Systemic | Mouse | 2 days × 1 mg/kg, i.p.  | 12 days (confined)    | 1 mg/kg, i.p. | AD13               | HDAC inhibitor (NaBut), 6 days × 0.4 g/kg, i.p., immediately after extinction (exposure to drug-paired compartment) | Facilitated extinction and decreased reinstatement                                            | (48) |                                                                            |
|          |          |       |                         |                       |               |                    | HDAC inhibitor (NaBut), 1 day × 0.4 g/kg, i.p., 30 min before Meth injection for the reinstatement test             | No change in reinstatement                                                                    |      |                                                                            |
| Meth     | NAc      | Mouse | 3 days × 2 mg/kg, i.p.  | N/A                   | N/A           | AD2                | Mil1 siRNA, 12 h before pre-test                                                                                    | Decreased CPP                                                                                 | (49) |                                                                            |
|          |          |       |                         | N/A                   | N/A           | AD2                | KDM5C siRNA, 12 h before pre-test                                                                                   | No change in CPP                                                                              |      |                                                                            |
|          |          |       |                         | CPP test on AD2       | N/A           | AD6                | KDM5C siRNA, 24 h after the 1 <sup>st</sup> CPP test                                                                | Decreased CPP after consolidation                                                             |      |                                                                            |
| Morphine | Systemic | Rat   | 4 days × 5 mg/kg, i.p.  | 8 days (non-confined) | 3 mg/kg, s.c. | AD11               | HDAC inhibitor (NaBut), 8 days × 1.2 g/kg, i.p., immediately after extinction                                       | Facilitated extinction and decreased reinstatement                                            | (50) |                                                                            |

|          |     |     |                         |                       |                |      |                                                                                                                     |                                                    |      |
|----------|-----|-----|-------------------------|-----------------------|----------------|------|---------------------------------------------------------------------------------------------------------------------|----------------------------------------------------|------|
|          |     |     |                         | 2 days<br>(confined)  |                | AD4  | HDAC inhibitor (NaBut), 2 days × 1.2 g/kg, i.p., immediately after extinction (exposure to drug-paired compartment) | Facilitated extinction and decreased reinstatement |      |
| Morphine | BLA | Rat | 4 days × 10 mg/kg, i.p. | 16 days<br>(confined) | 10 mg/kg, i.p. | AD17 | HDAC inhibitor (TSA), 12 days × 165 nm/1 μl, before extinction training                                             | Facilitated extinction and decreased reinstatement | (51) |

**Supplemental Table S5.** Epigenetic mechanisms of operant drug relapse.

**Abbreviations:** 5-AZA: 5-azacytidine; AAV: adeno-associated virus; AD: abstinence day; Amph: amphetamine; BLA: basolateral amygdala; dCas9: CRISPR; dmPFC: dorsomedial prefrontal cortex; dn: dominant negative; DNMT: DNA methyltransferase; DS: dorsal striatum; H3: Histone H3; HAT: histone acetyltransferase; HDAC: histone deacetylase; HSV: herpes simplex virus; hSyn: synapsin promoter; Inf: infusion; LA: lateral nucleus of the amygdala; mPFC: medial prefrontal cortex; NAc: nucleus accumbens; PhB: phenylbutyrate; RNAi: RNA interference; SAM: S-adenosylmethionine; sgRNA: single-guide RNA; shRNA: short hairpin RNA; VP64 transcriptional activation domain; VTA: ventral tegmental area. \*Other drug-associated behaviors were tested. #Observed incubation of drug seeking.

| Brain region | Drug type | Species | Operant training                                         | Extinction                                                                                  | Relapse paradigm(s)       | Abstinence day | Epigenetic manipulation                                                                                                                                               | Behavioral outcomes                                                                                           | Citations |
|--------------|-----------|---------|----------------------------------------------------------|---------------------------------------------------------------------------------------------|---------------------------|----------------|-----------------------------------------------------------------------------------------------------------------------------------------------------------------------|---------------------------------------------------------------------------------------------------------------|-----------|
| Systemic     | Cocaine   | Rat     | 4 discrete trials/h × 24 h access × 10 d (1.5 mg/kg/inf) | Within-session extinction/cue-induced reinstatement schedule                                |                           | AD14           | HDAC inhibitor (NaBut, 200 mg/kg, i.p.), injected daily during abstinence                                                                                             | No effect on extinction, decreased cue-induced reinstatement                                                  | (52)      |
| Systemic     | Cocaine   | Rat     | 1 h/d × 10 d (0.33 mg/kg/inf)                            | N/A                                                                                         | Drug-primed drug seeking  | AD21           | HDAC inhibitor (TSA, 0.3 mg/kg, i.v.), injected daily for 4 d prior to testing                                                                                        | Decreased drug-primed drug seeking                                                                            | (53)      |
|              |           |         |                                                          |                                                                                             |                           |                | HDAC inhibitor (PhB, 100 mg/kg, i.v.), injected daily for 4 d prior to testing                                                                                        | Decreased drug-primed drug seeking                                                                            |           |
|              |           |         |                                                          |                                                                                             |                           |                | HDAC inhibitor (PhB, 20 mg/kg, i.v.), injected daily for 4 d prior to testing                                                                                         | No effect on drug-primed drug seeking                                                                         |           |
| Systemic     | Cocaine   | Rat     | 1 h/d × 12 d or 24 d (1 mg/kg/inf)                       | 1 h/d × 8 d, cue presentation session in novel context (24 h after last extinction session) | Cue-induced reinstatement | AD10           | HAT (garcinol, 10 mg/kg, i.p.), injected 30 after cue presentation session                                                                                            | Decreased cue-induced reinstatement (specific to light but not tone cue)                                      | (54, 55)  |
| Systemic     | Cocaine   | Rat     | 1 h/d × 12 d (1 mg/kg/inf)                               | 1 h/d × 8 d, cue presentation session in novel context (24 h after last extinction session) | Cue-induced reinstatement | AD10           | HDAC inhibitor (TsA, 2.5 mg/kg, i.p.), injected 45 min after cue presentation session                                                                                 | Increased cue-induced reinstatement                                                                           | (54)      |
|              |           |         |                                                          |                                                                                             |                           |                | HAT (garcinol, 10 mg/kg, i.p.), injected 30 min after cue presentation session; HDAC inhibitor (TsA, 2.5 mg/kg, i.p.), injected 45 min after cue presentation session | No effect on cue-induced reinstatement (garcinol occluded TsA-mediated increase in cue-induced reinstatement) |           |
| Systemic     | Cocaine   | Rat     | 1 h/d × 12 d (1 mg/kg/inf)                               | 1 h/d × 8 d, cue presentation                                                               | Cue-induced reinstatement | AD10           | HAT (garcinol, 10 mg/kg, i.p.), injected 6 h after cue presentation session                                                                                           | No effect on cue-induced reinstatement                                                                        | (55)      |

|          |          |     |                                              |                                                               |                                                                                     |                  |                                                                                                                                   |                                                                                                                                                                   |      |
|----------|----------|-----|----------------------------------------------|---------------------------------------------------------------|-------------------------------------------------------------------------------------|------------------|-----------------------------------------------------------------------------------------------------------------------------------|-------------------------------------------------------------------------------------------------------------------------------------------------------------------|------|
|          |          |     |                                              | session in novel context (24 h after last extinction session) | Drug-primed reinstatement                                                           |                  | HAT (garcinol, 10 mg/kg, i.p.), injected 30 after drug presentation session                                                       | No effect on drug-primed reinstatement                                                                                                                            |      |
| Systemic | Heroin   | Rat | 4 h/d × 14 d (0.1-0.025 mg/kg/inf)           | 2 h/d × 14 d                                                  | Drug-primed reinstatement                                                           | AD15             | HDAC inhibitor (NaBut, 400 mg/kg, i.p.), injected 6 h prior to testing                                                            | Increased drug-primed reinstatement                                                                                                                               | (56) |
|          |          |     |                                              |                                                               |                                                                                     |                  | HDAC inhibitor (NaBut, 400 mg/kg, i.p.), injected 12 h prior to testing                                                           | No effect on drug-primed reinstatement                                                                                                                            |      |
| Systemic | Nicotine | Rat | 1 h/d × 12 d (30 µg/kg/inf)                  | 1 h/d × ≥ 6 d, 1 h/d × ≥ 2 d (between reinstatement tests)    | Cue-induced reinstatement, drug-primed reinstatement, cue+drug-primed reinstatement | ~AD7, AD10, AD13 | HDAC inhibitor (NaBut, 100 mg/kg, i.p.), injected immediately after extinction sessions                                           | No effect on extinction (potentially due to low levels of responding), no effect on cue-induced reinstatement, decreased drug- and drug+cue-induced reinstatement | (57) |
|          |          |     |                                              |                                                               |                                                                                     |                  | HDAC inhibitor (NaBut, 100 mg/kg, i.p.), injected 6 h after extinction sessions                                                   | No effect on drug- or drug+cue-induced reinstatement                                                                                                              |      |
| Systemic | Amph     | Rat | 1 h/d × 8 d (0.1 mg/kg/inf)                  | 1 h/d × 10 d, 1 h/d × 4 d (between reinstatement tests)       | Cue-induced reinstatement, drug-primed reinstatement                                | AD11, AD13       | HDAC inhibitor (TsA, 0.3 mg/kg, i.v.), injected 30 min prior to extinction and reinstatement sessions)                            | No effect on extinction, decreased cue-induced reinstatement, no effect on drug-primed reinstatement                                                              | (58) |
| Systemic | Cocaine  | Rat | 2 h/d × ≥ 10 d (0.75 mg/kg/inf)              | 2 h/d × ≥ 10 d, 2 h/d × 2 d between reinstatement tests       | Cue-induced reinstatement, drug-primed reinstatement                                | ~AD11, AD14      | MET (L-methionine) supplementation (10.4 mmol/ml, 1 ml/kg, s.c.), injected daily 1-2 h prior to every behavior session            | No effect on self-administration, extinction or cue-induced reinstatement, but decreased drug-primed reinstatement                                                | (59) |
| NAc      | Cocaine  | Rat | 3 h/d × 5 d/week × 3-4 weeks (0.5 mg/kg/inf) | 3 h/d × 5 d                                                   | Cue-induced reinstatement, drug-primed reinstatement, stress-induced reinstatement* | AD22             | HSV-G9a, injected prior to cocaine behaviors or self-administration training (virus was not expressed during reinstatement tests) | Increased stress-induced reinstatement                                                                                                                            | (60) |
| NAc      | Cocaine  | Rat | 3 h/d × 5 d/week × 3-4                       | 3 h/d × 5 d                                                   | Cue-induced reinstatement, drug-primed reinstatement,                               | AD20             | AAV-RNAi-G9a, 4-7 d prior to self-administration training                                                                         | Decreased stress-induced reinstatement                                                                                                                            | (61) |

|     |         |                                           | weeks, (0.5 mg/kg/inf)              |                                                                           | stress-induced reinstatement*                                                       |                 |                                                                                           |                                                                                                                     |      |
|-----|---------|-------------------------------------------|-------------------------------------|---------------------------------------------------------------------------|-------------------------------------------------------------------------------------|-----------------|-------------------------------------------------------------------------------------------|---------------------------------------------------------------------------------------------------------------------|------|
| NAc | Cocaine | Rat                                       | 6 h/d × 10 d (0.5 mg/kg/inf)        | Within-session extinction/cue-induced reinstatement schedule <sup>#</sup> |                                                                                     | AD1, AD45       | AAV-dnmt3a2-shRNA, injected on AD2 or prior to self-administration training               | Decreased cue-induced reinstatement                                                                                 | (26) |
| NAc | Cocaine | Rat                                       | 2 h/d × 10 d (1 mg/kg/inf)          | Within-session extinction (1 h/session × 8-10 sessions)                   | Drug-primed reinstatement                                                           | AD7             | HSV-dnSmad3, injected 3 d prior to testing                                                | Decreased drug-primed reinstatement                                                                                 | (29) |
|     |         |                                           |                                     |                                                                           |                                                                                     |                 | HSV-Smad3, injected 3 d prior to testing                                                  | Increased drug-primed reinstatement                                                                                 |      |
| NAc | Cocaine | Rat                                       | 2 h/d × ≥ 3 weeks (~0.89 mg/kg/inf) | 2 h/d × 8 d, 2 h/d × 2 d (between reinstatement tests)                    | Context-induced reinstatement, cue-induced reinstatement, drug-primed reinstatement | AD9, AD13, AD16 | HDAC3 inhibitor (RGFP966), injected 20 min prior to first extinction session)             | Decreased context-induced and cue-induced reinstatement, no effect on drug-primed reinstatement                     | (62) |
| NAc | Cocaine | Rat                                       | 3 h/d × 15-20 d (0.5 mg/kg/inf)     | 3 h/d × 6 d                                                               | Cue-induced reinstatement, drug-primed reinstatement, stress-induced reinstatement  | AD13            | AAV-HDAC5, 21 d prior to self-administration                                              | No effect on cue-induced reinstatement, drug-primed reinstatement or stress-induced reinstatement                   | (63) |
|     |         |                                           |                                     |                                                                           |                                                                                     |                 | AAV-HDAC5 3SA, 21 d prior to self-administration                                          | Decreased cue-induced reinstatement, decreased drug-primed reinstatement, no effect on stress-induced reinstatement |      |
| NAc | Cocaine | Mouse ( <i>Npas4</i> cKO <sup>NAc</sup> ) | 2 h/d × 10-14 d (0.5 mg/kg/inf)     | 3 h/d × ≥ 12 d                                                            | Cue-induced reinstatement                                                           | AD19-27         | AAV-Cre-eGFP                                                                              | No effect on cue-induced reinstatement                                                                              |      |
| NAc | Cocaine | Rat                                       | 2 h/d × 10 d (1 mg/kg/inf)          | Within-session extinction (1 h/session × 8-10 sessions)                   | Cue-induced reinstatement                                                           | AD7             | BRG1 inhibitor (PF13, 30 mmol/L), injected 1/d × 4 d with last injection 24 h before test | Decreased cue-induced reinstatement                                                                                 | (32) |
|     |         |                                           |                                     |                                                                           |                                                                                     |                 | HSV-Brg1, injected 3 d prior to testing                                                   | Increased cue-induced reinstatement                                                                                 |      |
|     |         |                                           |                                     |                                                                           |                                                                                     |                 | HSV-dnSmad3, injected 3 d prior to testing                                                | Decreased cue-induced reinstatement                                                                                 |      |
| NAc | Cocaine | Rat                                       | 6 h/d × 10 d (0.75 mg/kg/inf)       | N/A                                                                       | Drug seeking <sup>#</sup>                                                           | AD30            | DNMT inhibitor (RG108, 100 μM), AD29 and immediately prior to test on AD30                | Decreased drug seeking                                                                                              | (30) |

|     |         |     |                                                                                |                                                                                                                                                               |                                                   |            |                                                                                                          |                                                                      |      |
|-----|---------|-----|--------------------------------------------------------------------------------|---------------------------------------------------------------------------------------------------------------------------------------------------------------|---------------------------------------------------|------------|----------------------------------------------------------------------------------------------------------|----------------------------------------------------------------------|------|
|     |         |     |                                                                                |                                                                                                                                                               |                                                   |            | Methyl donor (SAM, 500 $\mu$ M), AD29 and immediately prior to test on AD30                              | Increased drug seeking                                               |      |
| NAc | Cocaine | Rat | 6 h/d $\times$ 10 d (0.5 mg/kg/inf)                                            | N/A                                                                                                                                                           | Drug seeking <sup>#</sup>                         | AD30       | HSV-INO80 $\Delta$ NC-EQ, injected 3 d prior to testing                                                  | Decreased drug seeking                                               | (34) |
|     |         |     |                                                                                |                                                                                                                                                               |                                                   |            | HSV-INO80, injected 3 d prior to testing                                                                 | Increased drug seeking                                               |      |
| NAc | Cocaine | Rat | 2 h/d $\times$ 10 d (0.7 mg/kg/inf)                                            | N/A                                                                                                                                                           | Drug seeking                                      | AD28       | hSynGW-mCherry-IRES-dCas9-VP64 sgRNA- <i>Nr4a1</i> , injected on AD21                                    | Decreased drug seeking                                               | (12) |
| NAc | Heroin  | Rat | 3 h/d $\times$ 10 d (0.02 mg/kg/inf)                                           | Within-session extinction (1 h/session $\times$ 8-10 sessions)                                                                                                | Drug-primed reinstatement                         | AD5        | HDAC2/3 inhibitor (MI-192, 1 $\mu$ M/mL), injected 1/d $\times$ 3 d with last injection 24 h before test | Decreased drug-primed reinstatement                                  | (64) |
| DS  | Meth    | Rat | 3 h/session $\times$ 3 sessions/d $\times$ 10 sessions in 14 d (0.1 mg/kg/inf) | N/A                                                                                                                                                           | Drug seeking <sup>#</sup>                         | AD30       | AAV-shHDAC5, injected 1 week prior to self-administration training                                       | Decreased drug seeking                                               | (65) |
|     |         |     |                                                                                |                                                                                                                                                               |                                                   | AD2        | AAV-shHDAC5, injected 1 week prior to self-administration training                                       | No effect on drug seeking                                            |      |
|     |         |     |                                                                                |                                                                                                                                                               |                                                   | AD30       | AAV-mHDAC5, injected 1 week prior to self-administration training                                        | Increased drug seeking                                               |      |
|     |         |     |                                                                                |                                                                                                                                                               |                                                   | AD2        | AAV-mHDAC5, injected 1 week prior to self-administration training                                        | No effect on drug seeking                                            |      |
| VTA | Cocaine | Rat | 6 h/d $\times$ 10 d (0.5 mg/kg/inf)                                            | N/A                                                                                                                                                           | Drug seeking                                      | AD30       | Lentivirus expressing H3.3Q5A, injected on AD1                                                           | Decreased drug seeking                                               | (1)  |
|     |         |     |                                                                                |                                                                                                                                                               |                                                   |            | Lentivirus expressing H3.3, injected on AD1                                                              | No effect on drug seeking                                            |      |
| LA  | Cocaine | Rat | 1 h/d $\times$ 12 d (1 mg/kg/inf)                                              | 1 h/d $\times$ 8 d, cue presentation session in novel context (24 h after last extinction session)                                                            | Cue-induced reinstatement                         | AD10       | HAT (garcinol, 500 ng), injected 1 h after cue presentation session                                      | Decreased cue-induced reinstatement (via reconsolidation disruption) | (54) |
| BLA | Cocaine | Rat | 1 h/session $\times$ 3 sessions/d $\times$ 10 d (0.75 mg/kg/inf)               | 3 h/d $\times$ 10 d, 15 min cue presentation session (24 h after last extinction session), 3 h/d $\times$ 2 d extinction sessions between reinstatement tests | Cue-induced reinstatement, cue+drug reinstatement | AD12, AD15 | DNMT inhibitor (5-AZA, 1 $\mu$ g/side), injected immediately after cue presentation session              | Decreased cue-induced reinstatement and cue+drug reinstatement       | (66) |
|     |         |     |                                                                                |                                                                                                                                                               |                                                   |            | DNMT inhibitor (5-AZA, 1 $\mu$ g/side), injected 6 h after cue presentation session                      | No effect on cue-induced reinstatement and cue+drug reinstatement    |      |



|       |         |     |                                                    |                                                                                                                                             |                                      |          |                                                                                                   |                                                   |      |
|-------|---------|-----|----------------------------------------------------|---------------------------------------------------------------------------------------------------------------------------------------------|--------------------------------------|----------|---------------------------------------------------------------------------------------------------|---------------------------------------------------|------|
| BLA   | Cocaine | Rat | 1 h/session × 3 sessions/d × 10 d (0.75 mg/kg/inf) | Cue presentation session (24 h after last training session), extinction sessions (3 h/d × 5 d) between drug seeking and reinstatement tests | Drug seeking, cue+drug reinstatement | AD2, AD8 | DNMT inhibitor (5-AZA, 1 µg/side), injected immediately after cue presentation session            | Decreased drug seeking and cue+drug reinstatement |      |
| dmPFC | Alcohol | Rat | 30 min/d × 15 d (0.1 mL, 10% alcohol)              | 30 min/d × 16 d                                                                                                                             | Stress-induced reinstatement         | AD17     | Lentivirus expressing shRNA targeting <i>Prdm2</i> , injected 1 week prior to self-administration | Increased stress-induced reinstatement*           | (67) |

**Supplemental References**

1. Lepack AE, Werner CT, Stewart AF, Fulton SL, Zhong P, Farrelly LA, *et al.* (2020): Dopaminylation of histone H3 in ventral tegmental area regulates cocaine seeking. *Science*. 368: 197-201
2. Ayala R, Willhoft O, Aramayo RJ, Wilkinson M, McCormack EA, Ocloo L, *et al.* (2018): Structure and regulation of the human INO80-nucleosome complex. *Nature*. 556: 391-395
3. Eustermann S, Schall K, Kostrewa D, Lakomek K, Strauss M, Moldt M, *et al.* (2018): Structural basis for ATP-dependent chromatin remodelling by the INO80 complex. *Nature*. 556: 386-390
4. Cleck JN, Ecke LE, Blendy JA (2008): Endocrine and gene expression changes following forced swim stress exposure during cocaine abstinence in mice. *Psychopharmacology (Berl)*. 201: 15-28
5. LaPlant Q, Vialou V, Covington HE, 3rd, Dumitriu D, Feng J, Warren BL, *et al.* (2010): Dnmt3a regulates emotional behavior and spine plasticity in the nucleus accumbens. *Nat Neurosci*. 13: 1137-43
6. Maze I, Feng J, Wilkinson MB, Sun H, Shen L, Nestler EJ (2011): Cocaine dynamically regulates heterochromatin and repetitive element unsilencing in nucleus accumbens. *Proc Natl Acad Sci U S A*. 108: 3035-40
7. Ferguson D, Koo JW, Feng J, Heller E, Rabkin J, Heshmati M, *et al.* (2013): Essential role of SIRT1 signaling in the nucleus accumbens in cocaine and morphine action. *J Neurosci*. 33: 16088-98
8. Sartor GC, Powell SK, Brothers SP, Wahlestedt C (2015): Epigenetic Readers of Lysine Acetylation Regulate Cocaine-Induced Plasticity. *J Neurosci*. 35: 15062-72
9. Li Y, Zhu R, Wang W, Fu D, Hou J, Ji S, *et al.* (2015): Arginine Methyltransferase 1 in the Nucleus Accumbens Regulates Behavioral Effects of Cocaine. *J Neurosci*. 35: 12890-902
10. Sun H, Damez-Werno DM, Scobie KN, Shao NY, Dias C, Rabkin J, *et al.* (2017): Regulation of BAZ1A and nucleosome positioning in the nucleus accumbens in response to cocaine. *Neuroscience*. 353: 1-6
11. Urb M, Niinep K, Matsalu T, Kipper K, Herodes K, Zharkovsky A, *et al.* (2020): The role of DNA methyltransferase activity in cocaine treatment and withdrawal in the nucleus accumbens of mice. *Addict Biol*. 25: e12720

12. Carpenter MD, Hu Q, Bond AM, Lombroso SI, Czarnecki KS, Lim CJ, *et al.* (2020): Nr4a1 suppresses cocaine-induced behavior via epigenetic regulation of homeostatic target genes. *Nat Commun.* 11: 504
13. Zhang YX, Akumuo RC, Espana RA, Yan CX, Gao WJ, Li YC (2018): The histone demethylase KDM6B in the medial prefrontal cortex epigenetically regulates cocaine reward memory. *Neuropharmacology.* 141: 113-125
14. Renthal W, Carle TL, Maze I, Covington HE, 3rd, Truong HT, Alibhai I, *et al.* (2008): Delta FosB mediates epigenetic desensitization of the c-fos gene after chronic amphetamine exposure. *J Neurosci.* 28: 7344-9
15. Mychasiuk R, Muhammad A, Ilnytsky S, Kolb B (2013): Persistent gene expression changes in NAc, mPFC, and OFC associated with previous nicotine or amphetamine exposure. *Behav Brain Res.* 256: 655-61
16. Fan XY, Yang JY, Dong YX, Hou Y, Liu S, Wu CF (2020): Oxytocin inhibits methamphetamine-associated learning and memory alterations by regulating DNA methylation at the Synaptophysin promoter. *Addict Biol.* 25: e12697
17. Mashayekhi FJ, Rasti M, Rahvar M, Mokarram P, Namavar MR, Owji AA (2012): Expression levels of the BDNF gene and histone modifications around its promoters in the ventral tegmental area and locus ceruleus of rats during forced abstinence from morphine. *Neurochem Res.* 37: 1517-23
18. Koo JW, Mazei-Robison MS, LaPlant Q, Egervari G, Braunscheidel KM, Adank DN, *et al.* (2015): Epigenetic basis of opiate suppression of Bdnf gene expression in the ventral tegmental area. *Nat Neurosci.* 18: 415-22
19. Fan XY, Shi G, Zhao P (2019): Reversal of oxycodone conditioned place preference by oxytocin: Promoting global DNA methylation in the hippocampus. *Neuropharmacology.* 160: 107778
20. Pascual M, Do Couto BR, Alfonso-Loeches S, Aguilar MA, Rodriguez-Arias M, Guerri C (2012): Changes in histone acetylation in the prefrontal cortex of ethanol-exposed adolescent rats are associated with ethanol-induced place conditioning. *Neuropharmacology.* 62: 2309-19
21. Hashimoto JG, Gavin DP, Wiren KM, Crabbe JC, Guizzetti M (2017): Prefrontal cortex expression of chromatin modifier genes in male WSP and WSR mice changes across ethanol dependence, withdrawal, and abstinence. *Alcohol.* 60: 83-94
22. Johnstone AL, Andrade NS, Barbier E, Khomtchouk BB, Rienas CA, Lowe K, *et al.* (2019): Dysregulation of the histone demethylase KDM6B in alcohol dependence is associated with epigenetic regulation of inflammatory signaling pathways. *Addict Biol.* e12816
23. Finegersh A, Ferguson C, Maxwell S, Mazariegos D, Farrell D, Homanics GE (2015): Repeated vapor ethanol exposure induces transient histone modifications in the brain that are modified by genotype and brain region. *Frontiers in molecular neuroscience.* 8: 39-39

24. Drissi I, Deschamps C, Fouquet G, Alary R, Peineau S, Gosset P, *et al.* (2019): Memory and plasticity impairment after binge drinking in adolescent rat hippocampus: GluN2A/GluN2B NMDA receptor subunits imbalance through HDAC2. *Addict Biol.* e12760
25. Li D, Zhang Y, Zhang Y, Wang Q, Miao Q, Xu Y, *et al.* (2019): Correlation between the epigenetic modification of histone H3K9 acetylation of NR2B gene promoter in rat hippocampus and ethanol withdrawal syndrome. *Mol Biol Rep.* 46: 2867-2875
26. Cannella N, Oliveira AMM, Hemstedt T, Lissek T, Buechler E, Bading H, *et al.* (2018): Dnmt3a2 in the Nucleus Accumbens Shell Is Required for Reinstatement of Cocaine Seeking. *J Neurosci.* 38: 7516-7528
27. Freeman WM, Patel KM, Brucklacher RM, Lull ME, Erwin M, Morgan D, *et al.* (2008): Persistent alterations in mesolimbic gene expression with abstinence from cocaine self-administration. *Neuropsychopharmacology.* 33: 1807-17
28. Freeman WM, Lull ME, Patel KM, Brucklacher RM, Morgan D, Roberts DC, *et al.* (2010): Gene expression changes in the medial prefrontal cortex and nucleus accumbens following abstinence from cocaine self-administration. *BMC Neurosci.* 11: 29
29. Gancarz AM, Wang ZJ, Schroeder GL, Damez-Werno D, Braunscheidel KM, Mueller LE, *et al.* (2015): Activin receptor signaling regulates cocaine-primed behavioral and morphological plasticity. *Nat Neurosci.* 18: 959-61
30. Massart R, Barnea R, Dikshtein Y, Suderman M, Meir O, Hallett M, *et al.* (2015): Role of DNA methylation in the nucleus accumbens in incubation of cocaine craving. *J Neurosci.* 35: 8042-58
31. Nielsen DA, Huang W, Hamon SC, Maili L, Witkin BM, Fox RG, *et al.* (2012): Forced Abstinence from Cocaine Self-Administration is Associated with DNA Methylation Changes in Myelin Genes in the Corpus Callosum: a Preliminary Study. *Front Psychiatry.* 3: 60
32. Wang ZJ, Martin JA, Mueller LE, Caccamise A, Werner CT, Neve RL, *et al.* (2016): BRG1 in the Nucleus Accumbens Regulates Cocaine-Seeking Behavior. *Biol Psychiatry.* 80: 652-660
33. Werner CT, Viswanathan R, Martin JA, Gobira PH, Mitra S, Thomas SA, *et al.* (2018): E3 Ubiquitin-Protein Ligase SMURF1 in the Nucleus Accumbens Mediates Cocaine Seeking. *Biol Psychiatry.* 84: 881-892
34. Werner CT, Mitra S, Martin JA, Stewart AF, Lepack AE, Ramakrishnan A, *et al.* (2019): Ubiquitin-proteasomal regulation of chromatin remodeler INO80 in the nucleus accumbens mediates persistent cocaine craving. *Sci Adv.* 5: eaay0351

35. Schmidt HD, Sangrey GR, Darnell SB, Schassburger RL, Cha JH, Pierce RC, *et al.* (2012): Increased brain-derived neurotrophic factor (BDNF) expression in the ventral tegmental area during cocaine abstinence is associated with increased histone acetylation at BDNF exon I-containing promoters. *J Neurochem.* 120: 202-9
36. Sadakierska-Chudy A, Frankowska M, Wydra K, Jastrzębska J, Miszkiel J, Filip M (2017): Increased 5-hydroxymethylation levels in the hippocampus of rat extinguished from cocaine self-administration. *Hippocampus.* 27: 811-821
37. Cadet JL, Brannock C, Jayanthi S, Krasnova IN (2015): Transcriptional and epigenetic substrates of methamphetamine addiction and withdrawal: evidence from a long-access self-administration model in the rat. *Mol Neurobiol.* 51: 696-717
38. Cates HM, Li X, Purushothaman I, Kennedy PJ, Shen L, Shaham Y, *et al.* (2018): Genome-wide transcriptional profiling of central amygdala and orbitofrontal cortex during incubation of methamphetamine craving. *Neuropsychopharmacology.*
39. Krasnova IN, Chiflikyan M, Justinova Z, McCoy MT, Ladenheim B, Jayanthi S, *et al.* (2013): CREB phosphorylation regulates striatal transcriptional responses in the self-administration model of methamphetamine addiction in the rat. *Neurobiol Dis.* 58: 132-43
40. Li X, Rubio FJ, Zeric T, Bossert JM, Kambhampati S, Cates HM, *et al.* (2015): Incubation of methamphetamine craving is associated with selective increases in expression of *Bdnf* and *trkb*, glutamate receptors, and epigenetic enzymes in cue-activated *fos*-expressing dorsal striatal neurons. *J Neurosci.* 35: 8232-44
41. Malvaez M, Sanchis-Segura C, Vo D, Lattal KM, Wood MA (2010): Modulation of chromatin modification facilitates extinction of cocaine-induced conditioned place preference. *Biol Psychiatry.* 67: 36-43
42. Itzhak Y, Liddie S, Anderson KL (2013): Sodium butyrate-induced histone acetylation strengthens the expression of cocaine-associated contextual memory. *Neurobiol Learn Mem.* 102: 34-42
43. Raybuck JD, McCleery EJ, Cunningham CL, Wood MA, Lattal KM (2013): The histone deacetylase inhibitor sodium butyrate modulates acquisition and extinction of cocaine-induced conditioned place preference. *Pharmacol Biochem Behav.* 106: 109-16
44. Malvaez M, McQuown SC, Rogge GA, Astarabadi M, Jacques V, Carreiro S, *et al.* (2013): HDAC3-selective inhibitor enhances extinction of cocaine-seeking behavior in a persistent manner. *Proc Natl Acad Sci U S A.* 110: 2647-52
45. Guo W, Long H, Bu Q, Zhao Y, Wang H, Tian J, *et al.* (2019): Role of BRD4 phosphorylation in the nucleus accumbens in relapse to cocaine-seeking behavior in mice. *Addict Biol.* e12808

46. Lax E, Friedman A, Massart R, Barnea R, Abraham L, Cheishvili D, *et al.* (2017): PARP-1 is required for retrieval of cocaine-associated memory by binding to the promoter of a novel gene encoding a putative transposase inhibitor. *Mol Psychiatry*. 22: 570-579
47. Lopez AJ, Hemstedt TJ, Jia Y, Hwang PH, Campbell RR, Kwapis JL, *et al.* (2019): Epigenetic regulation of immediate-early gene Nr4a2/Nurr1 in the medial habenula during reinstatement of cocaine-associated behavior. *Neuropharmacology*. 153: 13-19
48. Zhu J, Zhao N, Chen Y, Zhu L, Zhong Q, Liu J, *et al.* (2017): Sodium butyrate modulates a methamphetamine-induced conditioned place preference. *J Neurosci Res*. 95: 1044-1052
49. Aguilar-Valles A, Vaissiere T, Griggs EM, Mikaelsson MA, Takacs IF, Young EJ, *et al.* (2014): Methamphetamine-associated memory is regulated by a writer and an eraser of permissive histone methylation. *Biol Psychiatry*. 76: 57-65
50. Wang R, Zhang Y, Qing H, Liu M, Yang P (2010): The extinction of morphine-induced conditioned place preference by histone deacetylase inhibition. *Neurosci Lett*. 483: 137-42
51. Wang Y, Lai J, Cui H, Zhu Y, Zhao B, Wang W, *et al.* (2015): Inhibition of histone deacetylase in the basolateral amygdala facilitates morphine context-associated memory formation in rats. *J Mol Neurosci*. 55: 269-278
52. Peterson AB, Abel JM, Lynch WJ (2014): Dose-dependent effects of wheel running on cocaine-seeking and prefrontal cortex Bdnf exon IV expression in rats. *Psychopharmacology (Berl)*. 231: 1305-14
53. Romieu P, Deschatrettes E, Host L, Gobaille S, Sandner G, Zwiller J (2011): The inhibition of histone deacetylases reduces the reinstatement of cocaine-seeking behavior in rats. *Curr Neuropharmacol*. 9: 21-5
54. Monsey MS, Ruiz SG, Taylor JR (2020): Regulation of Garcinol on Histone Acetylation in the Amygdala and on the Reconsolidation of a Cocaine-Associated Memory. *Front Behav Neurosci*. 13: 281
55. Monsey MS, Sanchez H, Taylor JR (2017): The Naturally Occurring Compound Garcinia Indica Selectively Impairs the Reconsolidation of a Cocaine-Associated Memory. *Neuropsychopharmacology*. 42: 587-597
56. Chen WS, Xu WJ, Zhu HQ, Gao L, Lai MJ, Zhang FQ, *et al.* (2016): Effects of histone deacetylase inhibitor sodium butyrate on heroin seeking behavior in the nucleus accumbens in rats. *Brain Res*. 1652: 151-157
57. Castino MR, Cornish JL, Clemens KJ (2015): Inhibition of histone deacetylases facilitates extinction and attenuates reinstatement of nicotine self-administration in rats. *PLoS One*. 10: e0124796

58. Arndt DL, Wukitsch TJ, Garcia EJ, Cain M (2019): Histone deacetylase inhibition differentially attenuates cue-induced reinstatement: An interaction of environment and acH3K9 expression in the dorsal striatum. *Behav Neurosci.* 133: 478-488
59. Wright KN, Hollis F, Duclot F, Dossat AM, Strong CE, Francis TC, *et al.* (2015): Methyl supplementation attenuates cocaine-seeking behaviors and cocaine-induced c-Fos activation in a DNA methylation-dependent manner. *J Neurosci.* 35: 8948-58
60. Anderson EM, Larson EB, Guzman D, Wissman AM, Neve RL, Nestler EJ, *et al.* (2018): Overexpression of the Histone Dimethyltransferase G9a in Nucleus Accumbens Shell Increases Cocaine Self-Administration, Stress-Induced Reinstatement, and Anxiety. *J Neurosci.* 38: 803-813
61. Anderson EM, Sun H, Guzman D, Taniguchi M, Cowan CW, Maze I, *et al.* (2019): Knockdown of the histone di-methyltransferase G9a in nucleus accumbens shell decreases cocaine self-administration, stress-induced reinstatement, and anxiety. *Neuropsychopharmacology.* 44: 1370-1376
62. Hitchcock LN, Raybuck JD, Wood MA, Lattal KM (2019): Effects of a histone deacetylase 3 inhibitor on extinction and reinstatement of cocaine self-administration in rats. *Psychopharmacology (Berl).* 236: 517-529
63. Taniguchi M, Carreira MB, Cooper YA, Bobadilla AC, Heinsbroek JA, Koike N, *et al.* (2017): HDAC5 and Its Target Gene, Npas4, Function in the Nucleus Accumbens to Regulate Cocaine-Conditioned Behaviors. *Neuron.* 96: 130-144 e6
64. Martin JA, Werner CT, Mitra S, Zhong P, Wang ZJ, Gobira PH, *et al.* (2019): A novel role for the actin-binding protein drebrin in regulating opiate addiction. *Nat Commun.* 10: 4140
65. Li X, Carreria MB, Witonsky KR, Zeric T, Lofaro OM, Bossert JM, *et al.* (2018): Role of Dorsal Striatum Histone Deacetylase 5 in Incubation of Methamphetamine Craving. *Biol Psychiatry.* 84: 213-222
66. Shi HS, Luo YX, Yin X, Wu HH, Xue G, Geng XH, *et al.* (2015): Reconsolidation of a cocaine associated memory requires DNA methyltransferase activity in the basolateral amygdala. *Sci Rep.* 5: 13327
67. Barbier E, Johnstone AL, Khomtchouk BB, Tapocik JD, Pitcairn C, Rehman F, *et al.* (2017): Dependence-induced increase of alcohol self-administration and compulsive drinking mediated by the histone methyltransferase PRDM2. *Mol Psychiatry.* 22: 1746-1758
